# Supplementary material
Source: PubMed Central journal article supplement (PMC5419490)
Supplement: 481file001.pdf [file 481file001.pdf]

**Supplemental Table 1.** *S. pombe* strains used in this work. The gene deletion and *mre11* point mutation strains are derivatives of KRP3-4. We note that *S. pombe mre11<sup>+</sup>* and *rad52<sup>+</sup>* were previously named *rad32<sup>+</sup>* and *rad22<sup>+</sup>*. *Hermes* insertion sites are noted by the chromosome number and base pair in the *S. pombe* genome sequence (Materials and Methods). Mutants bearing *Hermes* and *kanMX*-tagged mutations were constructed by mating and tetrad dissection as both markers confer G418-resistance.

| Strain                                                  | Genotype                                                                       | Source            |
|---------------------------------------------------------|--------------------------------------------------------------------------------|-------------------|
| <b>Wild type and transposon insertion strains</b>       |                                                                                |                   |
| KRP1                                                    | <i>h- ade6-M216 leu1-32 ura4-D18 his7-366</i>                                  | This study        |
| KRP3-4                                                  | <i>h- ade6-M216 leu1-32 ura4-D18 his7-366 chr I 1,279,108::Hermes</i>          | This study        |
| KRP3-3                                                  | <i>h- ade6-M216 leu1-32 ura4-D18 his7-366 chr I 5,443,647::Hermes</i>          | This study        |
| KRP201                                                  | <i>h+ ade6-M216 leu1-32 ura4-D18</i>                                           | This study        |
| P9G2                                                    | <i>h+ ade6-M216 leu1-32 ura4-D18 chr I 633,603::Hermes</i>                     | This study        |
| P10G2                                                   | <i>h+ ade6-M216 leu1-32 ura4-D18 chr II 3,487,136::Hermes</i>                  | This study        |
| P12G2                                                   | <i>h+ ade6-M216 leu1-32 ura4-D18 chr I 1,057,536::Hermes</i>                   | This study        |
| P13B2                                                   | <i>h+ ade6-M216 leu1-32 ura4-D18 chr I 2,684,662::Hermes</i>                   | This study        |
| P15B11                                                  | <i>h+ ade6-M216 leu1-32 ura4-D18 chr II 147,681::Hermes</i>                    | This study        |
| P18G2                                                   | <i>h+ ade6-M216 leu1-32 ura4-D18 chr II 532,055::Hermes</i>                    | This study        |
| P24B11                                                  | <i>h+ ade6-M216 leu1-32 ura4-D18 chr II 4,032,934::Hermes</i>                  | This study        |
| P22G2                                                   | <i>h+ ade6-M216 leu1-32 ura4-D18 chr II 1,688,066::Hermes</i>                  | This study        |
| <b>Strains used to construct mutants</b>                |                                                                                |                   |
| TN1257                                                  | <i>h+ ade6-M216 leu1-32 ura4-D18 his3-D1 pku70Δ::KanMX</i>                     | S Sanders         |
| TN2099                                                  | <i>h+ ade6-M210 leu1-32 ura4-D18 his3-D1 lig4Δ::KanMX</i>                      | S Sanders         |
| NR2840                                                  | <i>h+ ade6-M216 leu1-32 ura4-D18 his3-D1 rad50Δ::KanMX</i>                     | T Nakamura        |
| TN2389                                                  | <i>h- ade6-M216 leu1-32 ura4-D18 his3-D1 nbs1Δ::KanMX</i>                      | T Nakamura        |
| JW4166                                                  | <i>h+ leu1-32 ura4-D18 mre11-13myc:kanMX6</i>                                  | P Russell         |
| JW4167                                                  | <i>h+ leu1-32 ura4-D18 mre11-L77K-13myc:kanMX6</i>                             | P Russell         |
| JW4169                                                  | <i>h+ leu1-32 ura4-D18 mre11-L77K L154D-13myc:kanMX6</i>                       | P Russell         |
| JW4170                                                  | <i>h+ leu1-32 ura4-D18 mre11-H68S-13myc:kanMX6</i>                             | P Russell         |
| JW4171                                                  | <i>h+ leu1-32 ura4-D18 mre11-H134S-13myc:kanMX6</i>                            | P Russell         |
| P34G06                                                  | <i>h+ ade6-M216 leu1-32 ura4-D18 mre11Δ::KanMX4</i>                            | Bioneer Version 2 |
| P20C05                                                  | <i>h+ ade6-M216 leu1-32 ura4-D18 ctp1Δ::KanMX4</i>                             | Bioneer Version 2 |
| <b>Deletion strains used in Figures 4, 5, S2 and S5</b> |                                                                                |                   |
| KRP180                                                  | <i>h- ade6-M216 leu1-32 ura4-D18 chr I 1,279,108::Hermes</i>                   | This study        |
| KRP175                                                  | <i>h+ ade6-M216 leu1-32 ura4-D18 chr I 1,279,108::Hermes</i>                   | This study        |
| KRP176                                                  | <i>h+ ade6-M216 leu1-32 ura4-D18 chr I 1,279,108::Hermes<br/>ctp1Δ::KanMX4</i> | This study        |
| KRP177                                                  | <i>h+ ade6-M216 leu1-32 ura4-D18 chr I 1,279,108::Hermes</i>                   | This study        |

|                                                                   |                                                                                                |            |
|-------------------------------------------------------------------|------------------------------------------------------------------------------------------------|------------|
|                                                                   | <i>mre11Δ::KanMX4</i>                                                                          |            |
| KRP178                                                            | <i>h+ ade6-M216 leu1-32 ura4-D18 chr I 1,279,108::Hermes rad50Δ::KanMX4</i>                    | This study |
| KRP179                                                            | <i>h- ade6-M216 leu1-32 ura4-D18 chr I 1,279,108::Hermes nbs1Δ::KanMX4</i>                     | This study |
| KRP181                                                            | <i>h+ ade6-M216 leu1-32 ura4-D18 chr I 1,279,108::Hermes pku70Δ::KanMX4</i>                    | This study |
| KRP183                                                            | <i>h+ ade6-M216 leu1-32 ura4-D18 chr I 1,279,108::Hermes lig4Δ::KanMX4</i>                     | This study |
| KRP184                                                            | <i>h+ ade6-M216 leu1-32 ura4-D18 chr I 1,279,108::Hermes mre11Δ::KanMX4 lig4Δ::KanMX4</i>      | This study |
| KRP332                                                            | <i>KRP3-4 made ura4<sup>+</sup> by transformation (a rad52<sup>+</sup> control for KRP341)</i> | This study |
| KRP341                                                            | <i>KRP3-4 rad52Δ::ura4<sup>+</sup></i>                                                         | This study |
| <b><i>mre11 mutant strains used in Figures 6, 7, 8 and S7</i></b> |                                                                                                |            |
| KRP240                                                            | <i>h- ura4-D18 leu1-32 chr I 1,279,108::Hermes mre11-13myc:kanMX6</i>                          | This study |
| KRP241                                                            | <i>h- ura4-D18 leu1-32 chr I 1,279,108::Hermes mre11-L77K-13myc:kanMX6</i>                     | This study |
| KRP243                                                            | <i>h- ura4-D18 leu1-32 chr I 1,279,108::Hermes mre11-L77K L154D-13myc:kanMX6</i>               | This study |
| KRP245                                                            | <i>h- ura4-D18 leu1-32 chr I 1,279,108::Hermes mre11-H134S-13myc:kanMX6</i>                    | This study |
| KRP275                                                            | <i>h- ura4-D18 leu1-32 chr I 1,279,108::Hermes mre11-H134S-13myc:kanMX6 ctp1Δ::KanMX4</i>      | This study |
| KRP263                                                            | <i>h- ade6-M216 ura4-D18 leu1-32 chr I 1,279,108::Hermes mre11-13myc:kanMX6</i>                | This study |
| KRP258                                                            | <i>h- ade6-M216 ura4-D18 leu1-32 chr I 1,279,108::Hermes mre11-H68S-13myc:kanMX6</i>           | This study |
| KRP333                                                            | <i>KRP240 but ura4<sup>+</sup> (a pso2<sup>+</sup> control for KRP330)</i>                     | This study |
| KRP330                                                            | <i>KRP240 pso2Δ::ura4<sup>+</sup></i>                                                          | This study |
| KRP331                                                            | <i>KRP275 but ura4<sup>+</sup> (a pso2<sup>+</sup> control for KRP334)</i>                     | This study |
| KRP334                                                            | <i>KRP275 pso2Δ::ura4<sup>+</sup></i>                                                          | This study |

**Supplemental Table 2.** Oligonucleotides used in this work. Gene deletions were constructed by transforming cells with either a PCR product that completely replaces the coding sequences with the *kanMX* gene encoding resistance to G418 (Longtine *et al.* 1998), or by amplifying a validated deletion from purchased deletion library (Kim *et al.* 2010). Overlap PCR products were constructed with ~300 bp of 5' flanking sequence – *kanMX* – 300 bp of 3' flanking sequence and the mutants were verified by using conformation primers in the genome outside of the PCR product and primers that hybridize to the *kanMX* gene (CPC1-KANC and CPN1-KANB). Conversion of the *ura4-D18* allele was performed by transforming cells with the PCR product amplified from a *ura4*<sup>+</sup> strain with the *ura4-520\_S* and *ura4-250\_AS* primers. Genbank formatted files of the final deletions with the positions of the primers indicated are available upon request.

| Name                                                                                                         | Sequence                                                                       |
|--------------------------------------------------------------------------------------------------------------|--------------------------------------------------------------------------------|
| <b><i>Primers used to transfer alleles from existing strains</i></b>                                         |                                                                                |
| <i>ura4-250_AS</i>                                                                                           | GAT TCC TCG TAA CAT TGC CAG                                                    |
| <i>ura4-520_S</i>                                                                                            | CGT AAT GAC AAA ACA GCT TGT ATA G                                              |
| <i>pku70_S</i>                                                                                               | TGC AAC TTA CGA CGG CTT TA                                                     |
| <i>pku70_AS</i>                                                                                              | TGA AGG TTG AAT TGT TTG TCG                                                    |
| <i>lig4_AS</i>                                                                                               | CTT TCA AAG GCA GAC GCT TT                                                     |
| <i>lig4_S</i>                                                                                                | CTT TAA AGCA GGC GAT GAG G                                                     |
| <i>rad32_cp5</i>                                                                                             | GAT CCC TTC TTG GTT CAA AGA AGG A                                              |
| <i>rad32_cp3</i>                                                                                             | CAA ACT TGC AAA ACT TGA TCT CGT C                                              |
| <i>ctp1_cp5</i>                                                                                              | TTT ACA AAT GAC GAG TGC TGA CAA A                                              |
| <i>ctp1_cp3</i>                                                                                              | ATT TCT TGA GCC TAA CTC GAC TTT C                                              |
| <b><i>Primers used to create 5' flanking sequence – kanMX – 3' flanking sequence deletion constructs</i></b> |                                                                                |
| <i>rad50_5_S</i>                                                                                             | GTT AAA CCA GTG CCT CCT TTC                                                    |
| <i>kanMX-rad50_AS</i>                                                                                        | CCA GTG TCG AAA ACG AGC TCC ATT TTA AAT TAC TTA AAC<br>TGA ACA CAC TTT C       |
| <i>rad50_3_AS</i>                                                                                            | AGA TCG GAC CTT GCA TTT CTC                                                    |
| <i>kanMX-rad50_S</i>                                                                                         | GAG GCA AGC TAA ACA GAT CTA ATT AAT GAT GAA TAT ATT<br>CGA CCT TAC             |
| <i>kanMX_AS</i>                                                                                              | GAG CTC GTT TTC GAC ACT GG                                                     |
| <i>kanMX_S</i>                                                                                               | AGA TCT GTT TAG CTT GCC TC                                                     |
| <i>pso2-u4_AS</i>                                                                                            | CCA ATC CAC ATT TTC CAA TGA AAG GCG AAA CTT TTT GAC<br>ATC TAA TTT ATT CTG     |
| <i>pso2-u4_S</i>                                                                                             | TTT GCC TTT GTT TAC GTT CAC TGA ATT AAA AAA GTT TGT ATA<br>GAT TAT TTA ATC TAC |
| <i>psoZ_AS</i>                                                                                               | ACG AAG CTC AAA GAA AGT TTA AAA G                                              |

|                                 |                                 |
|---------------------------------|---------------------------------|
| psoY_S (used with<br>pso2W_AS)  | CAT TTT AGA CCA GAT CCT GAC C   |
| pso2X_S (used with<br>pso2Z_AS) | CTT TCA TTG GAA AAT GTG GAT TGG |
| pso2W_AS                        | TTC AGT GAA CGT AAA CAA AGG CA  |

**Primers to confirm deletions or transfer of markers by transformation**

|               |                                   |
|---------------|-----------------------------------|
| CPC1-KANC     | GGC TGG CCT GTT GAA CAA GTC TGG A |
| CPN1-KANB     | CTG CAG CGA GGA GCC GTA AT        |
| pku70_conf_AS | TGT AGG TGT CCG ATA CCT TC        |
| pku70_conf_S  | CCA AAC TGC GTA GCC GAC AC        |
| lig4_Conf_AS  | TAG TCT GAC TTG CAG CGC TC        |
| lig4_Conf_S   | CTT TCT TTG AGC AGG AGT AAG       |
| lig4_ConfS #1 | CTT TCT TTG AGC AGG AGT AAG       |
| lig4_ConfAS#1 | TAG TCT GAC TTG CAG CGC TC        |
| rad32_conf_S  | TAC ACG GCT TTA AGG TCC TC        |
| rad32_conf_AS | AAA CAT GAT TTG GCA AGA CTC AC    |
| nbs1_conf2_AS | TGC TGA CTC AGG AGG ATT GG        |
| nbs1_conf2_S  | CCA GTA GTG CAT ATA CAC GAC       |
| ctp1_conf_AS  | AAG GGA CGT GGT CAA ATT TCC       |
| ctp1_conf_S   | ATT AGG ATG GTA GTC GCG TC        |
| pso2_conf_AS  | CTA AAT GAA CTA ATG TTA AGT ATT C |
| pso2_conf_S   | ACC CTT CCT TAG GTA TAC TTC       |
| ura4g_confAS  | GTT ATG TTG CCA AAC ATC CTC C     |
| u4conf_AS     | TTT AGA GAA AGA ATG CTG AGT AG    |
| rad52_confS   | GCG AAG ATA TGT TTC GCA GTC       |
| rad52_confAS  | CTG ATA CAG TAG CGA ATT CAC ATC   |

**Other primers**

|                         |                                                         |
|-------------------------|---------------------------------------------------------|
| Hermes3-4_rightProbe_S  | GGC TGA TCC ATT ACT CAA TTG G                           |
| Hermes3-4_rightProbe_AS | CTT ACG CAG ACA CTA AAA AAG AAT CC                      |
| rad52_5_S               | GGG ATT AAT TGA TTA GTA ATT ACG AAA ATC C               |
| ura4-rad52_5_AS         | GTA GAT TAA ATA ATC TAT ACA AAC TTT TTT AAG ACA TCC CTT |
| rad52_3_AS              | CTA GCT TAT ATG AAG                                     |
| ura4-rad52_3_S          | CCC AAC TAG TGG TAT GAA AGG                             |
| 3-4_S                   | CAG AAT AAA TTA GAT GTC AAA AAG TTT CGG GAT AAA AGT     |
| 3-4_AS                  | AAT GAG GCA AAA TGT GAT G                               |
| 3-4_2S                  | TCC CGG TAT GTG TAA ATC AAA                             |
| 3-4_2AS                 | TCG GCT TGC CAT TTT CTA AT                              |
| 3-3_S                   | CCC GGT ATG TGT AAA TCA AAG AAA GC                      |
| 3-3_AS                  | AAT TGC CTC TCA CGA GCA CGA T                           |
| M13 forward             | CAT GCA ATA ACC CAT TGA AAA A                           |
| M13 reverse             | GGG GTA TGG AGT GAG AAG GTT3'                           |
| pHL2577-3633S           | TGT AAA ACG ACG GCC AGT                                 |
| pHL2577-3527AS          | CAG GAA ACA GCT ATG AC                                  |
|                         | CAC AAC TTA ACA ACA ACA GTT GTT TG                      |
|                         | TTG TGC TTA TCT ATG TGG CTT AC                          |

Hermes\_Sau3A I

CAC AAC TTA ACA ACA ACA GTT GTT TG

---

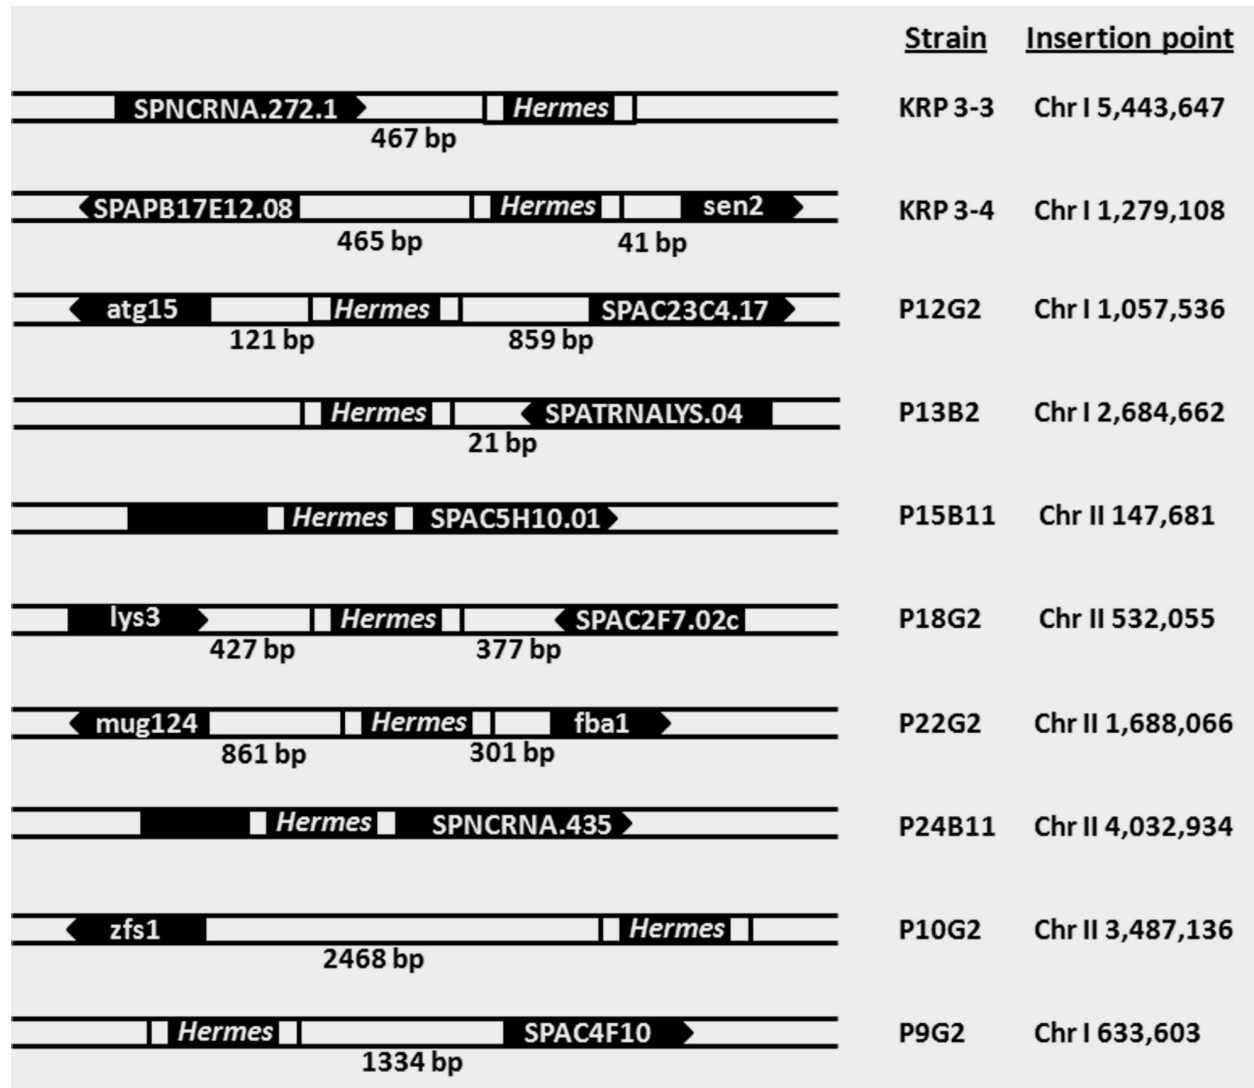

**Supplemental Fig. S1.** Most *Hermes* transposon insertions from the transient transfection protocol are single events. Transposase producing cells were transformed with the transposon plasmid (as in Fig. 1) and the site of *Hermes* genomic integration was determined by inverse PCR. The transposon is designated as a black box labeled “*Hermes*” bordered by two white boxes. The results from two independent transformations are shown. The top two integrants (KRP3-3 and KRP3-4) are in the strain KRP1 while the remaining integrants are in KRP201. The distance from intergenic *Hermes* insertions to the ATG or stop codon of the nearest ORF is shown. Of the 12 randomly chosen colonies, 10 contained single insertions (above), and two had no insertion but retained the transposon plasmid (pHL2577, Fig. 1).

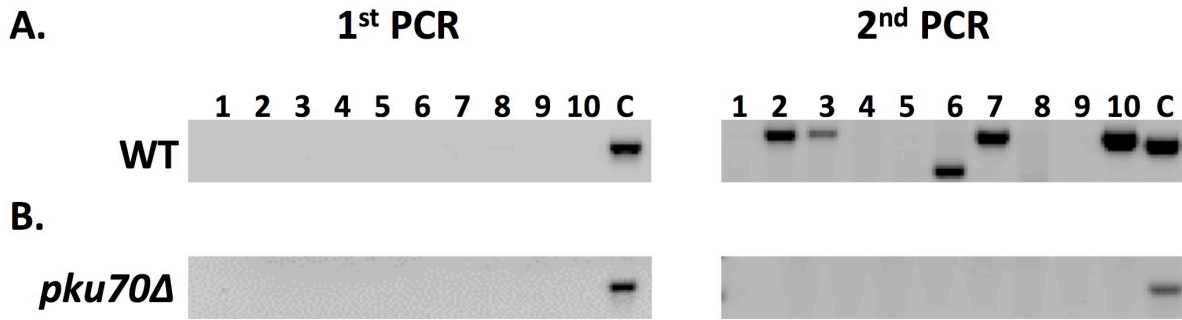

**Supplemental Fig. S2.** Efficient *Hermes* transposon excision requires transposase expression.

A. KRP 3-4 cells lacking the transposase expression plasmid were tested in the transposon excision assay. No products were obtained in the first round PCR, in contrast to cells expressing transposase (Fig. 2B). The low level of correct second round PCR products shows that excision events are rare, and yields a median excision frequency of less than  $10^{-7}$  per cell or 1000-fold less than the excision frequency in transposase-expressing cells (Fig. 5). Thus, transposase is required to produce the excision products shown in Fig. 3A.

B. The assay in part A was performed in cells bearing the *pku70*Δ mutation and lacking the transposase expression plasmid. The results indicate that transposase is required to generate the aberrant excision events in *pku70*Δ mutant cells (Fig. 4).

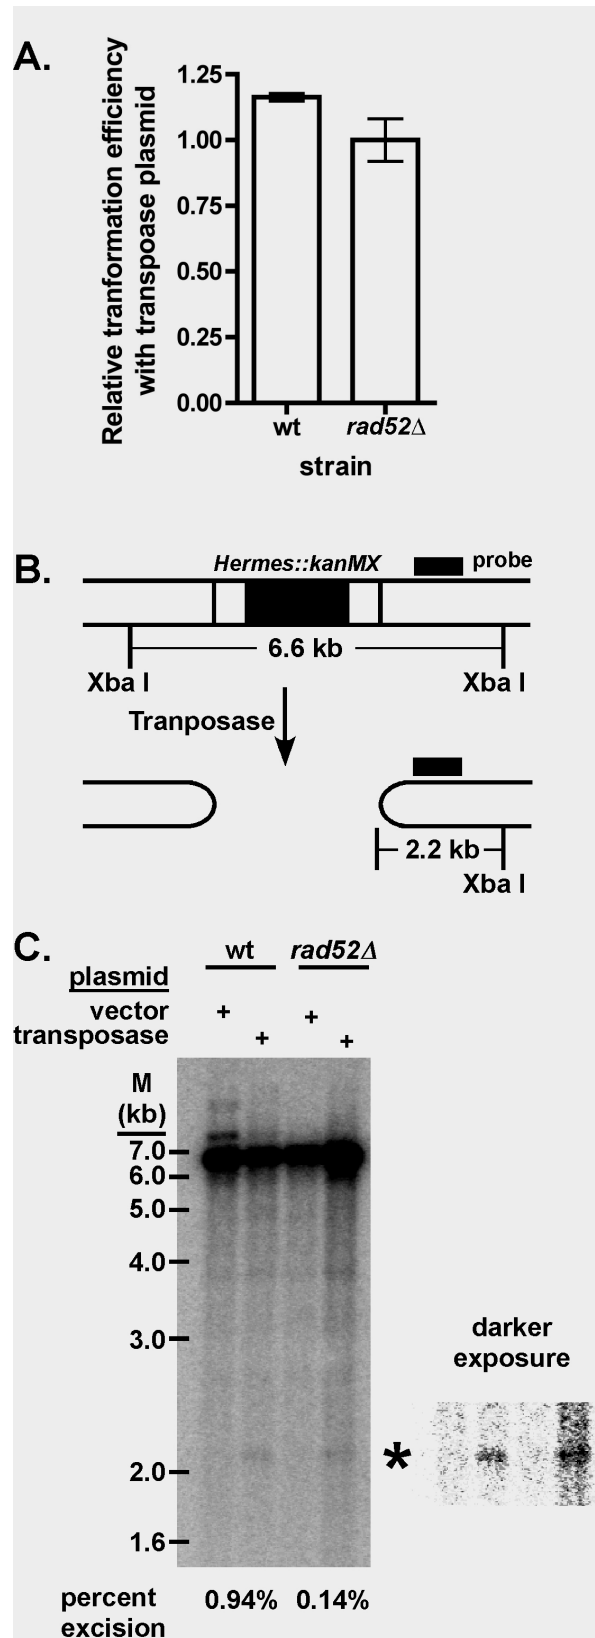

**Supplemental Fig. S3.** Estimation of *Hermes* excision frequency by quantitative transformation



and Southern blotting. A. Wild type and *rad52* $\Delta$  cells bearing the *Hermes* insertion (KRP332 and KRP341, Supplemental Table 1) were grown to exponential phase and each strain was transformed with equal molar amounts of either vector (pREP81) or transposase plasmid (pHL2578), and aliquots were plated onto selective medium. The numbers of transposase plasmid transformants normalized to the average number of vector transformants are plotted. While *rad52* $\Delta$  strain had a lower efficiency of transformation compared to wild type cells (1.00 versus 1.16), the two values were not significantly different by t-test ( $P > 0.11$ ). Under the hypothesis that excision in a *rad52* $\Delta$  strain is lethal, these data indicate that the rate of excision is a few percent or less. B and C. Single wild type and *rad52* $\Delta$  transformants from A bearing either the vector (pREP81) or the transposase expression plasmid (pHL2578, (Evertts *et al.* 2007)) were grown in selective, transposase-inducing medium (EMM + ahu + 2% glucose) for ~10 population doublings and genomic DNA was prepared from each culture. DNA (2  $\mu$ g) was digested with *Xba* I and analyzed by Southern blotting using the probe shown in B. Excision frequency was determined by the ratio of intensities of the excised band (at 2.2 kb, marked by \*) to the unexcised band (at 6.6 kb), and is shown at the bottom of the gel in C.

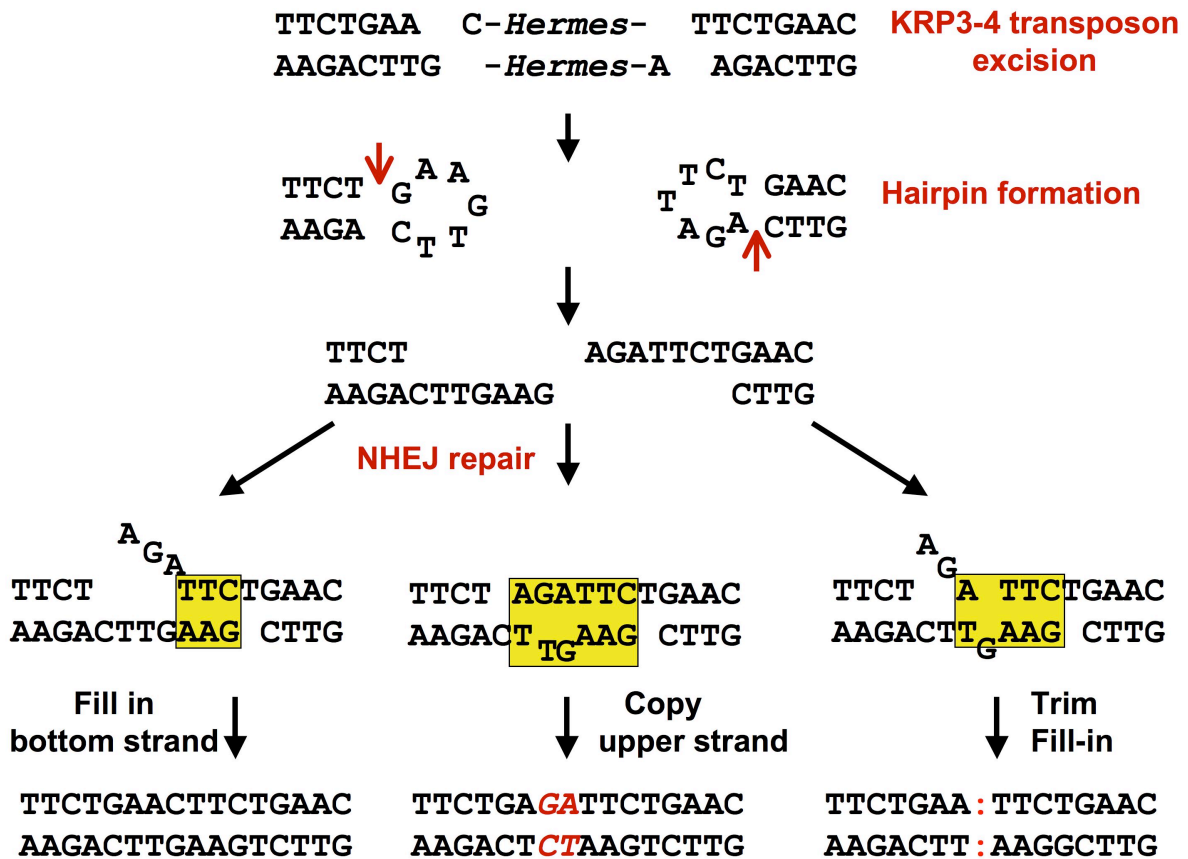

**Supplemental Fig. S4.** A role for the MRN complex in *S. pombe* NHEJ is consistent with frequently observed repair products. *Hermes* excision produces hairpin ends (Zhou *et al.* 2004) that are cleaved (e.g. at the red arrows), and the structure of Mre11 indicates that it can mediate base pairing of the 5' overhangs (Williams *et al.* 2008). Removal of unpaired bases and/or strand extension similar to the normal processes associated with NHEJ (Daley *et al.* 2005; Mcvey and Lee 2008) could account for 3 of the most frequently observed KRP 3-4 excision footprints (bracketed in Fig. 3A).

| GTTGCAGTAATTGCTAG <u>TTCTGAAC</u> |                 |               | CCAATTCTTGGATG                 | WT genome        |
|-----------------------------------|-----------------|---------------|--------------------------------|------------------|
| GTTGCAGTAATTGCTAG <u>TTCTGAAC</u> |                 | <b>Hermes</b> | <u>TTCTGAAC</u> CCAATTCTTGGATG | Hermes insertion |
| GTTGCAGTAATTGCTAG                 | <u>TTCTGAAC</u> | □             | .....AAC CCAATTCTTGGATG        | 2                |
| GTTGCAGTAATTGCTAG                 | <u>TTCTGAAC</u> |               | ..... CCAATTCTTGGATG           | 2                |
| GTTGCAGTAATTGCTAG                 | <u>TTCTGAAC</u> | □             | - - 289 bp deletions- -        | 1                |
| GTTGCAGTAATTGCTAG                 | <u>TTCTGAAC</u> | □             | - - 336 bp deletions- -        | 2                |
| } <i>pku70Δ</i>                   |                 |               |                                |                  |
| GTTGCAGTAATTGCTAG                 | <u>TTCTGAAC</u> | □             | <u>TTCTGAAC</u> CCAATTCTTGGATG | 5                |
| GTTGCAGTAATTGCTAG                 | <u>TTCTGAA</u>  | □             | <u>TTCTGAAC</u> CCAATTCTTGGATG | 2                |
| GTTGCAGTAATTGCTAG                 | <u>TTCTGAAC</u> | □             | .....AAC CCAATTCTTGGATG        | 2                |
| GTTGCAGTAATTGCTAG                 | <u>TTCTGAAC</u> | □             | - - 29 bp deletions - -        | 2                |
| GTTGCAGTAATTGCTAG                 | <u>TTCTGAAC</u> | □             | - - 378 bp deletions- -        | 2                |
| GTTGCAGTAATTGCTAG                 | <u>TTCTGAAC</u> | □             | - - 514 bp deletions- -        | 1                |
| } <i>rad50Δ</i>                   |                 |               |                                |                  |
| GTTGCAGTAATTGCTAG                 | <u>TTCTGAAC</u> |               | <u>TTCTGAAC</u> CCAATTCTTGGATG | 2                |
| GTTGCAGTAATTGCTAG                 | <u>TTCTGAGA</u> |               | <u>TTCTGAAC</u> CCAATTCTTGGATG | 2                |
| } <i>nbs1Δ</i>                    |                 |               |                                |                  |
| GTTGCAGTAATTGCTAG                 | <u>TTCTGAAC</u> |               | ..... CCAATTCTTGGATG           | 5                |
| } <i>mre11Δ</i>                   |                 |               |                                |                  |
| GTTGCAGTAATTGCTAG                 | <u>TTCTGAAC</u> |               | <u>TTCTGAAC</u> CCAATTCTTGGATG | 2                |
| GTTGCAGTAATTGCTAG                 | <u>TTCTGAGA</u> |               | <u>TTCTGAAC</u> CCAATTCTTGGATG | 3                |
| } <i>ctp1Δ</i>                    |                 |               |                                |                  |

**Supplemental Fig. S5.** *Hermes* excision footprints from different NHEJ mutants. Products from the second round of PCR of mutant cells (Fig. 4) were cloned and sequenced. A red colon signifies a base deletion while the hollow box signifies a portion of the *Hermes* transposon. Sequencing revealed that some mutants (*mre11Δ*, *nbs1Δ*, *ctp1Δ*) gave footprints similar to wild type cells. Other mutants (*pku70Δ*, *rad50Δ*) retained a portion of the *Hermes* transposon and showed larger deletions. These results suggest that an inefficient repair process can heal the hairpin capped DSBs at very low frequencies in the absence of NHEJ.

|                            |                        | <b>Hermes</b> |                    |                         |                            |
|----------------------------|------------------------|---------------|--------------------|-------------------------|----------------------------|
| GTTGCAGTAATTGCTAG          | <u>TTCTGAAC</u>        |               | <u>TTCTGAAC</u>    | CCAATTCTTGGATG          | WT genome                  |
| GTTGCAGTAATTGCTAG          | <u>TTCTGAAC</u>        |               | <u>TTCTGAAC</u>    | CCAATTCTTGGATG          | <i>Hermes</i> insertion    |
| GTTGCAGTAAC <u>T</u> GCTAG | <u>TTCTGAGA</u>        |               | <u>TTCTGAAC</u>    | CCAATTCTTGGATG          | 2                          |
| GTTGCAGTAATTGCTAG          | <u>TTCTGAAC</u>        |               | <u>TT : TGAAC</u>  | CCAATTCTTGGATG          | 2 <i>mre11-H68S</i>        |
| GTTGCAGTAATTGCTAG          | <u>TTCTGAAC</u>        |               | <u>TTCTGAAC</u>    | CCAATTCTTGGATG          | 7                          |
| GTTGCAGTAATTGCTAG          | <u>TTCTGAAC</u>        |               | <u>: : : : : :</u> | CCAATTCTTGGATG          | 1                          |
| GTTGCAGTAATTGCTAG          | <u>TTCTGAAC</u>        |               | <u>TTCTGAAC</u>    | CCAATTCTTGGATG          | 1                          |
| GTTGCAGTAATTGCTAG          | <u>TTCTGAGA</u>        |               | <u>TTCTGAAC</u>    | CCAATTCTTGGATG          | 3                          |
| GTTGCAGTAATTGCTAG          | <u>TTCTGAAC</u>        |               | <u>: TCTGAAC</u>   | CCAATTCTTGGATG          | 1 <i>mre11-H134S</i>       |
| GTTGCAGTAATTGCTAG          | <u>TTCTGAAC</u>        |               | <u>T : : GAAC</u>  | CCAATTCTTGGATG          | 1                          |
| GTTGCAGTAAT <u>A</u> GCTAG | <u>TTCTGAAC</u>        |               | <u>T : : GAAC</u>  | CCAATT <u>A</u> TTGGATG | 1                          |
| GTTGCAGTAATTGCTAG          | <u>TTCTGAGA</u>        |               | <u>TTCTGAAC</u>    | CCAATTCTTGGATG          | 2                          |
| GTTGCAGTAATTGCTAG          | <u>TTCTGAAC</u>        |               | <u>: TCTGAAC</u>   | CCAATTCTTGGATG          | 1                          |
| GTTGCAGTAATTGCTAG          | <u>TTCTGA : :</u>      |               | <u>: TCTGAAC</u>   | CCAATTCTTGGATG          | 1                          |
| GTTGCAGTAATTGCT : G        | <u>: : : : : A : :</u> |               | <u>TTCTGAAC</u>    | CTAATTCTTGGATG          | 1                          |
| GTTGCAGCAATTGCTAG          | <u>TTCTGAAT</u>        |               | <u>T : CTGAAC</u>  | CCAATTCTTGGATG          | 1 <i>ctp1Δ mre11-H134S</i> |
| GTTGCAGTAATTGCTAG          | <u>TTCTGAAC</u>        |               | <u>: : CTGAAC</u>  | CCAATTCTTGGATG          | 1                          |
| GTTGCAGTAATTGCTAG          | <u>TTCTGAAC</u>        |               | <u>TTCTGAAC</u>    | CCAATTCTTGGATG          | 1                          |
| GT : GCAGTAAT : GCTTG      | <u>TTCTCGAC</u>        |               | <u>T : CTGAAC</u>  | CCAATTCTTGGATG          | 1                          |

C

**Supplemental Fig. S6.** Sequences of Mre11 nuclease mutant excision events. *Hermes* excision events from sequencing the first round PCR products (Figs. 6, 7) show transposon footprints similar to wild type cells. The 8 bp direct repeats are underlined, and some PCR products contain mutations outside of these repeats. Base changes are shown in red, deletions are indicated by a colon and portions of the *Hermes* transposon are shown by a hollow box. The bottom sequence from *ctp1Δ mre11-H134S* cells also contains a “C” insertion that is shown below the sequence.

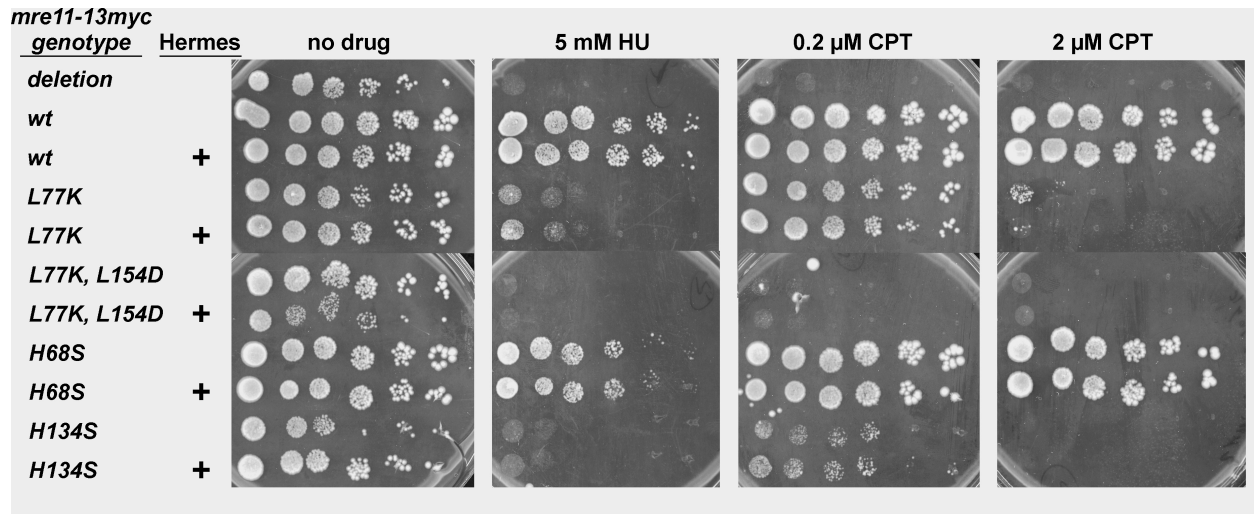

**Supplemental Fig. S7.** The *Hermes* insertion does not change the sensitivity of *mre11* mutants to hydroxyurea (HU) or camptothecin (CPT). Cells bearing a deletion of *mre11*<sup>+</sup> or different alleles in the *mre11*<sup>+</sup>-*13myc* background were tested for drug sensitivity by spotting 5  $\mu$ l of 5-fold serial dilutions onto YES plates bearing no drug or different concentrations of HU or CPT. The presence of *Hermes* (indicated by a “+”) did not cause a significant change in growth on plates bearing the DNA damaging agents. The levels of sensitivity shown here parallel the results originally published for these mutants (Williams *et al.* 2008).

### Supplemental References

- Daley, J. M., P. L. Palmbo, D. Wu and T. E. Wilson, 2005 Nonhomologous end joining in yeast. *Annu. Rev. Genet.* 39: 431-451.
- Evertts, A. G., C. Plymire, N. L. Craig and H. L. Levin, 2007 The hermes transposon of *Musca domestica* is an efficient tool for the mutagenesis of *Schizosaccharomyces pombe*. *Genetics* 177: 2519-2523.
- Kim, D. U., J. Hayles, D. Kim, V. Wood, H. O. Park *et al.*, 2010 Analysis of a genome-wide set of gene deletions in the fission yeast *Schizosaccharomyces pombe*. *Nat. Biotechnol.* 28: 617-623.
- Longtine, M. S., A. R. McKenzie, D. J. Demarini, N. G. Shah, A. Wach *et al.*, 1998 Additional modules for versatile and economical PCR-based gene deletion and modification in *Saccharomyces cerevisiae*. *Yeast* 14: 953-961.
- Mcvey, M., and S. E. Lee, 2008 MMEJ repair of double-strand breaks (director's cut): deleted sequences and alternative endings. *Trends Genet.* 24: 529-538.
- Williams, R. S., G. Moncalian, J. S. Williams, Y. Yamada, O. Limbo *et al.*, 2008 Mre11 dimers coordinate DNA end bridging and nuclease processing in double-strand-break repair. *Cell* 135: 97-109.
- Zhou, L., R. Mitra, P. W. Atkinson, A. B. Hickman, F. Dyda *et al.*, 2004 Transposition of hAT elements links transposable elements and V(D)J recombination. *Nature* 432: 995-1001.
